# Supplementary figures and images for: Identification of Plasma Exosomes hsa_circ_0001360 and hsa_circ_0000038 as Key Biomarkers of Coronary Heart Disease
Source: Hindawi journal article supplement (doi:10.1155/2024/5557143), 2024-03-26

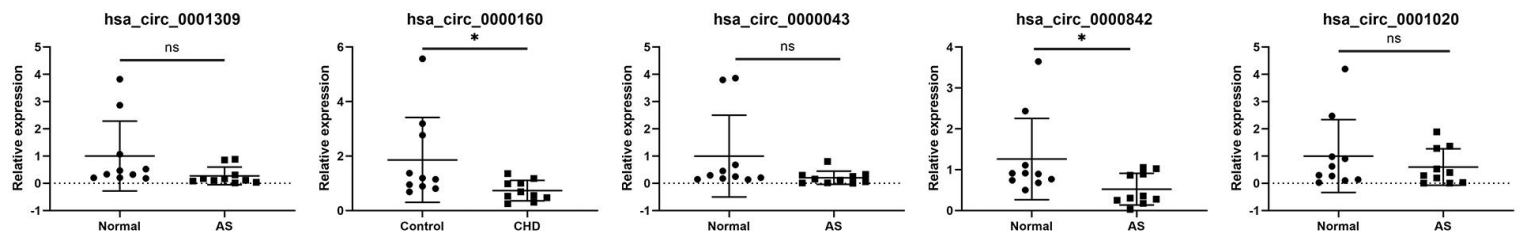

Supplementary Fig1. Expression levels of circRNAs in normal and AS groups. AS: atherosclerosis.

Supplement: f1 [file 5557143.f1.zip]
